# Supplementary material
Source: PubMed Central journal article supplement (PMC6394877)
Supplement: NIHMS1521011-supplement-2.pdf [file NIHMS1521011-supplement-2.pdf]

Figure S1

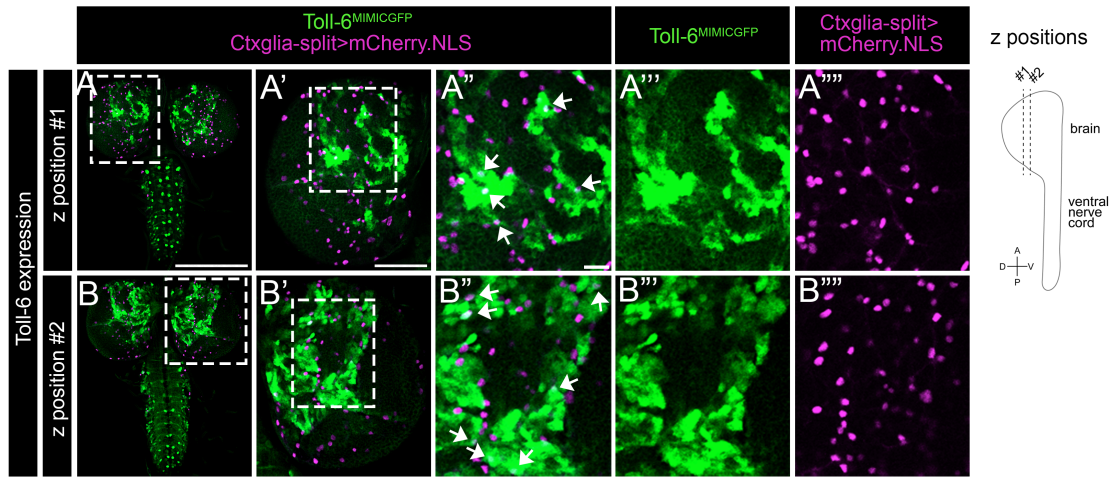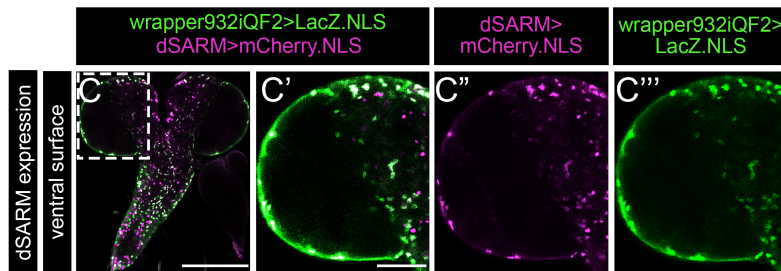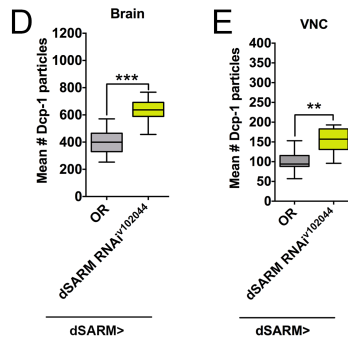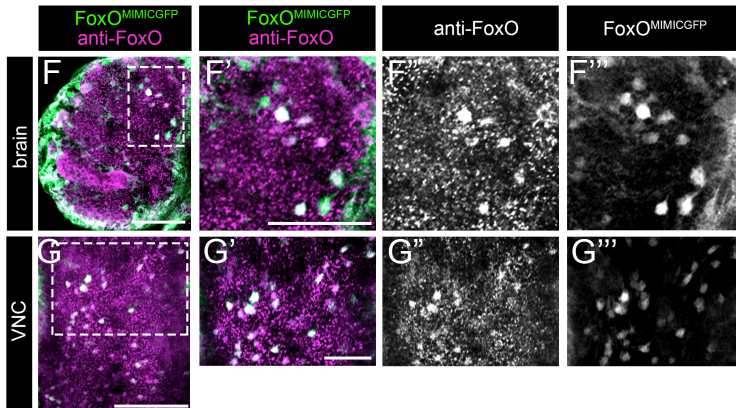

**Figure S1. Expression and validation of Toll-6, dSARM and FoxO in cortex glia, related to Figure 2.** (A-B) Representative 3  $\mu\text{m}$  z-projections of Ctxglia-split>mCherry.NLS, Toll-6<sup>MIMICGFP/+</sup> L3 CNS labeled with anti-GFP (green) and anti-mCherry (magenta). Scale bar is 200  $\mu\text{m}$ . (A', B') Projections of one brain lobe depicting co-labeling of anti-GFP with anti-mCherry. Scale bar is 50  $\mu\text{m}$ . (A'', B'') Higher magnification projections of cortex glial nuclei (anti-mCherry) labeled with Toll-6<sup>MIMICGFP</sup> (anti-GFP). Single channel projections of brain lobe labeled with (A''', B''') anti-GFP and (A''', B''') anti-mCherry. Scale bar is 10  $\mu\text{m}$ . (C) Representative 3  $\mu\text{m}$  z-projections of wrapper932iQF2>LacZ.NLS; dSARM>mCherry.NLS L3 CNS labeled with anti- $\beta\text{gal}$  (green) and anti-mCherry (magenta). Scale bar is 200  $\mu\text{m}$ . (C') Higher magnification projection of one brain lobe depicting co-labeling of anti- $\beta\text{gal}$  and anti-mCherry. Single channel projections of brain lobe labeled with (C'') anti-mCherry and (C''') anti- $\beta\text{gal}$ . Scale bar is 50  $\mu\text{m}$ . Quantification of total Dcp-1 particles in the (D) brain of: dSARMGal4/+; 396; dSARM>dSARM RNAi<sup>v102044</sup>; 632; and (E) VNC of: dSARMGal4/+; 100; dSARM>dSARM RNAi<sup>v102044</sup>; 156. (F) Representative 3  $\mu\text{m}$  z-projections of a FoxO<sup>MIMICGFP/+</sup> brain lobe labeled with anti-GFP (green) and anti-FoxO (magenta). Scale bar is 50  $\mu\text{m}$ . (F') Higher magnification projection of brain lobe labeled with anti-GFP and anti-FoxO. Single channel projections of (F'') anti-FoxO and (F''') anti-GFP. Scale bar is 25  $\mu\text{m}$ . (G) Representative 3  $\mu\text{m}$  z-projections of 2 segments of a FoxO<sup>MIMICGFP/+</sup> VNC labeled with anti-GFP (green) and anti-FoxO (magenta). Scale bar is 75  $\mu\text{m}$ . (G') Higher magnification projection of anti-GFP and anti-FoxO co-labeling. Single channel projections of (G'') anti-FoxO and (G''') anti-GFP. Scale bar is 25  $\mu\text{m}$ . \*\*,  $P < 0.01$ ; \*\*\*,  $P < 0.001$ .

Figure S2

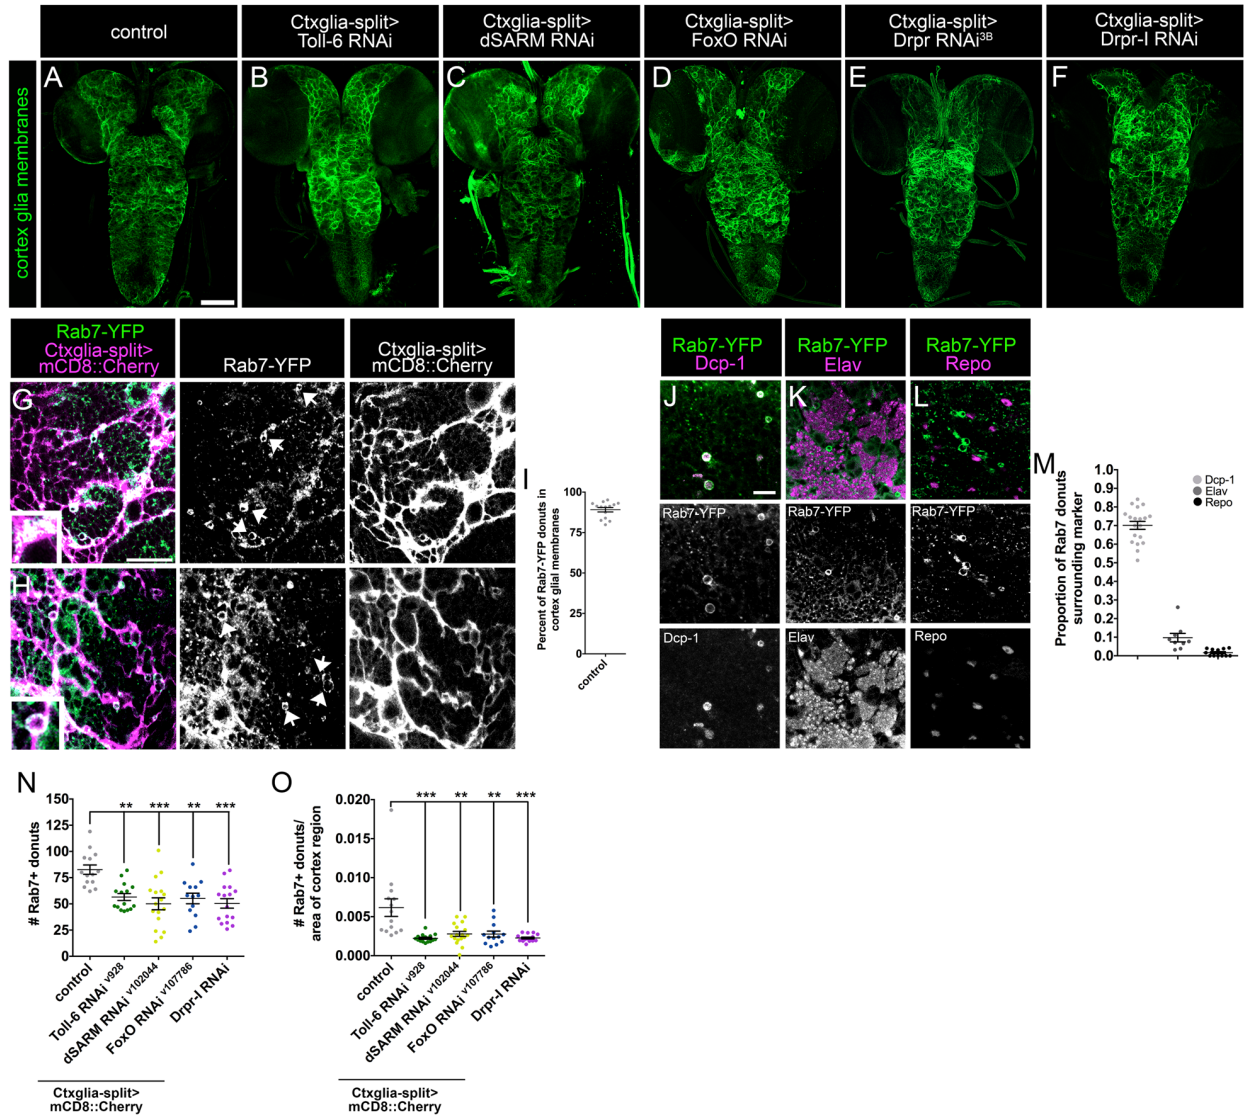

**Figure S2. Loss of Toll-6-FoxO signaling does not alter gross morphology of cortex glia but does lead to defects in phagocytic machinery, related to Figure 3.**

(A-F) Ventral z-projections depicting cortex glial processes in the L3 CNS labeled with Ctxglia-split>mCD8::GFP in indicated genotypes. Scale bar is 50  $\mu$ m. (G-H) Representative confocal projections depicting Rab7-YFP (green) localized within cortex glial membranes (magenta). Insets depict (G) diffuse Rab7-YFP labeling or (H) Rab7-YFP donut within cortex glial membranes. Arrows denote Rab7-YFP donuts. Scale bar is 20  $\mu$ m. (I) Quantification of the percent of Rab7-YFP donuts within cortex glial membranes in Ctxglia-split>mCD8::Cherry, Rab7-YFP/+ brains mean is  $89 \pm 1.3$  % (n=16). Error bars are SEM. Representative projections of Rab7-YFP donuts (green) associated with (J) Dcp-1 (magenta); (K) Elav (magenta); and (L) Representative projection of Rab7-YFP donuts (green) associated with Repo (magenta) in L3 brains. Scale bar is 15  $\mu$ m. (M) Quantification of Rab7-YFP donuts surrounding apoptotic (Dcp-1), neuronal (Elav), or glial (Repo) markers in Ctxglia-split>mCD8::Cherry, Rab7-YFP/+ brains means are: Dcp-1:  $0.7 \pm 0.02$  (n=19); Elav:  $0.1 \pm 0.02$  (n=9); Repo:  $0.02 \pm 0.005$  (n=12). Error bars are SEM. (N) Quantification of number of Rab7-YFP donuts within cortex glial membranes in indicated genotypes, means are: Ctxglia-split>mCD8::Cherry, Rab7-YFP/+ (control):  $83 \pm 4.5$  (n=14); Ctxglia-split>Toll-6 RNAi<sup>v928</sup>; mCD8::Cherry, Rab7-YFP/+ :  $57 \pm 3.3$  (n=15); Ctxglia-split>dSARM RNAi<sup>v102044</sup>; mCD8::Cherry, Rab7-YFP/+ :  $50 \pm 5.7$  (n=17); Ctxglia-split>FoxO RNAi<sup>v107786</sup>; mCD8::Cherry, Rab7-YFP/+ :  $55 \pm 5.0$  (n=13); Ctxglia-split>Drpr-I RNAi; mCD8::Cherry, Rab7-YFP/+ :  $50 \pm 4.5$  (n=16). (O) Quantification of number of Rab7-YFP donuts normalized to area of cortex region in: Ctxglia-split>mCD8::Cherry, Rab7-YFP/+ (control):  $0.0062 \pm 0.001$  (n=14); Ctxglia-split>Toll-6 RNAi<sup>v928</sup>; mCD8::Cherry, Rab7-YFP/+ :  $0.0022 \pm 0.00013$  (n=15); Ctxglia-split>dSARM RNAi<sup>v102044</sup>; mCD8::Cherry, Rab7-YFP/+ :  $0.0028 \pm 0.00032$  (n=17); Ctxglia-split>FoxO RNAi<sup>v107786</sup>; mCD8::Cherry, Rab7-YFP/+ :  $0.0028 \pm 0.00038$  (n=13); Ctxglia-split>Drpr-I RNAi; mCD8::Cherry, Rab7-YFP/+ :  $0.0023 \pm 0.00011$  (n=16). \*\*, P<0.01; \*\*\*, P<0.001.

Figure S3

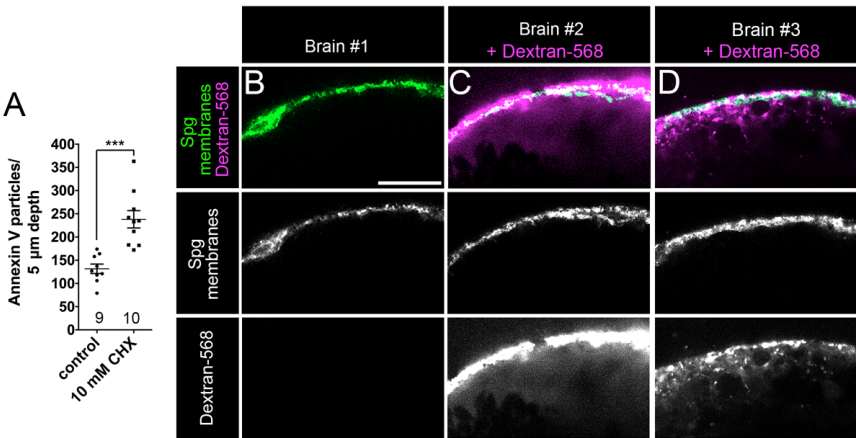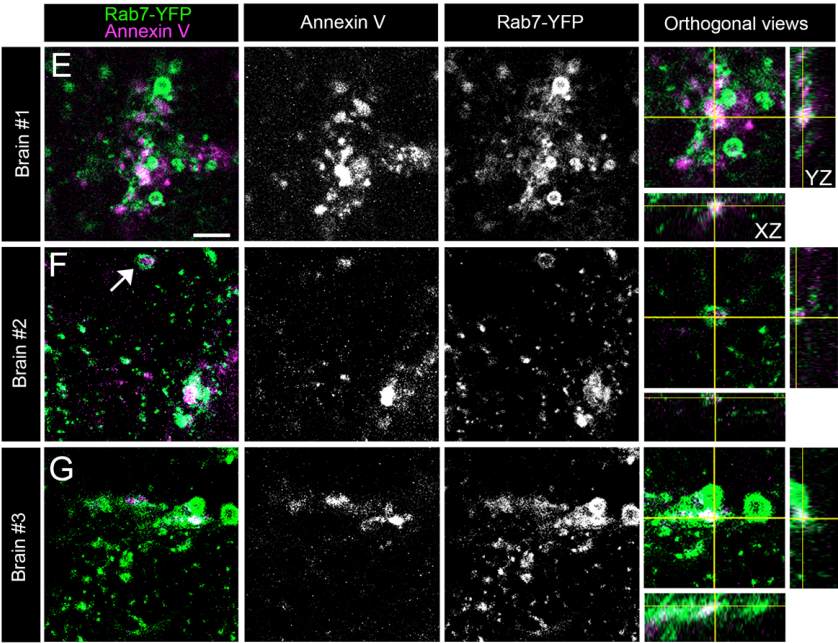

Figure S3. **Annexin V crosses the BBB and co-localizes with Rab7-YFP, related to Figure 4.** (A) Quantification of Annexin V particles in the brain of: control treated:  $132 \pm 10$ ; CHX treated:  $238 \pm 19$ . Representative images of L3 brains with subperineurial glia labeled with mCD8::GFP (spg>mCD8::GFP) and (B) not incubated with Dextran-568; (C-D) incubated with 10 kDa Dextran-568 (magenta). Scale bar is 25  $\mu\text{m}$ . (E-G) Representative images of endogenously tagged Rab7-YFP co-localized with Annexin V in cortex region of the L3 brain in live tissue. Arrow indicates a Rab7-YFP donut surrounding an Annexin V particle. Scale bar is 15  $\mu\text{m}$ . *n* is noted at the bottom of each column; \*\*\*,  $P < 0.001$ .

Figure S4

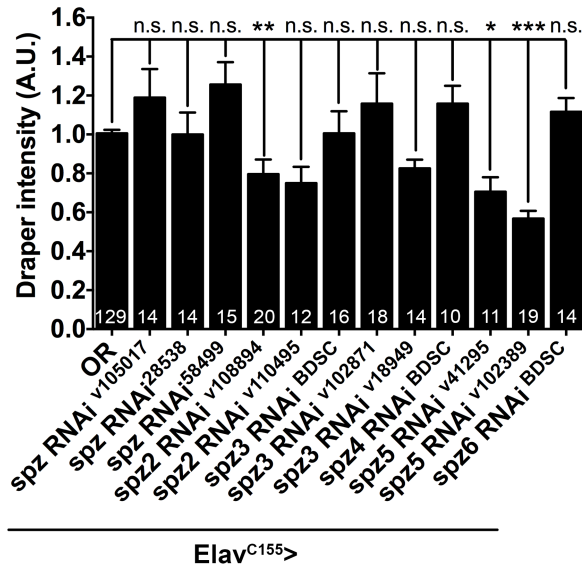

Figure S4. **A neuronal Spätzle protein serves as a Toll-6 ligand, related to Figure 5.** Quantification of mean Drpr intensity normalized to control:  $Elav^{C155}Gal4/+$ :  $1.0 \pm 0.02$ ;  $Elav^{C155}>Spz\ RNAi^{v105017}$ :  $1.2 \pm 0.15$ ;  $Elav^{C155}>Spz\ RNAi^{28538}$ :  $1.0 \pm 0.1$ ;  $Elav^{C155}>Spz\ RNAi^{58499}$ :  $1.3 \pm 0.1$ ;  $Elav^{C155}>Spz2\ RNAi^{v108894}$ :  $0.8 \pm 0.08$ ;  $Elav^{C155}>Spz2\ RNAi^{v110495}$ :  $0.75 \pm 0.08$ ;  $Elav^{C155}>Spz3\ RNAi^{BDSC}$ :  $1.0 \pm 0.1$ ;  $Elav^{C155}>Spz3\ RNAi^{v102871}$ :  $1.2 \pm 0.2$ ;  $Elav^{C155}>Spz3\ RNAi^{v18949}$ :  $0.83 \pm 0.05$ ;  $Elav^{C155}>Spz4\ RNAi^{BDSC}$ :  $1.2 \pm 0.1$ ;  $Elav^{C155}>Spz5\ RNAi^{v41295}$ :  $0.71 \pm 0.08$ ;  $Elav^{C155}>Spz5\ RNAi^{v102389}$ :  $0.57 \pm 0.04$ ;  $Elav^{C155}>Spz6\ RNAi^{BDSC}$ :  $1.1 \pm 0.07$ . n is noted at the bottom of each column. n.s., not significantly different. \*,  $P < 0.05$ ; \*\*,  $P < 0.01$ ; \*\*\*,  $P < 0.001$ . Error bars are SEM.

Figure S5

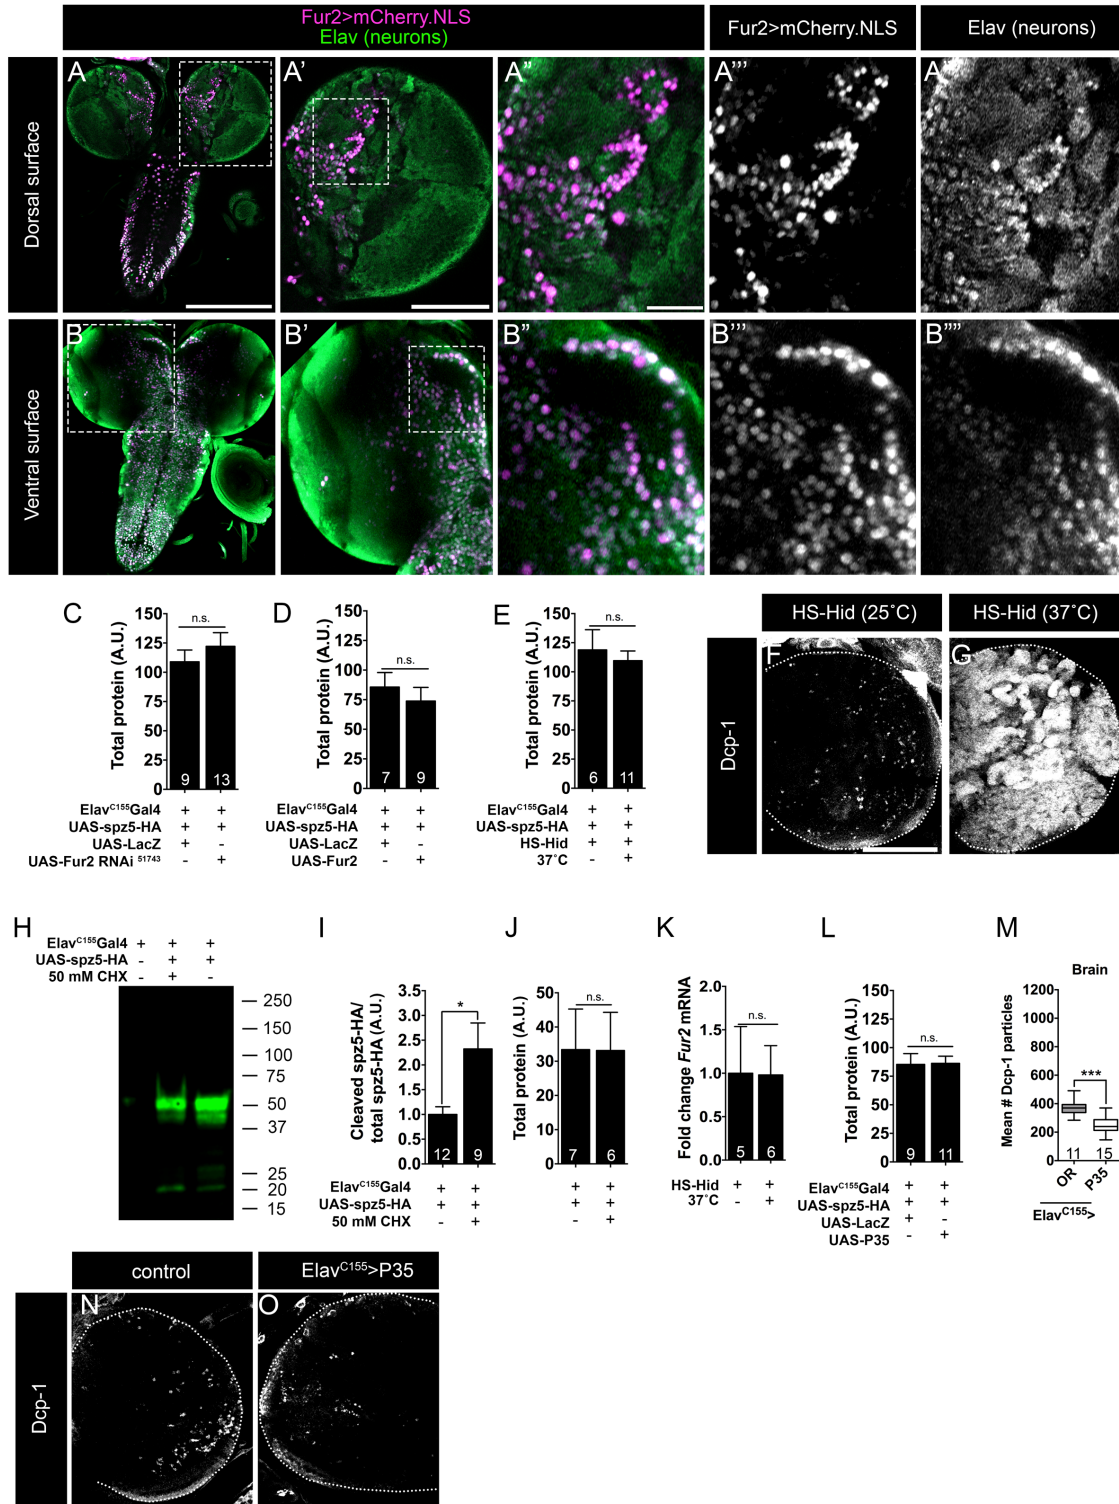



**Figure S5. Fur2 is expressed in neurons and cleaves Spz5 in response to elevated apoptosis, related to Figure 6.** (A,B) Projection of Fur2>mCherry.NLS L3 CNS labeled with anti-Elav (green) and anti-mCherry (magenta). Scale bar is 150  $\mu$ m. (A', B') Projection of one brain lobe labeled with anti-Elav (green) and anti-mCherry (magenta). Scale bar is 60  $\mu$ m. (A'', B'') Higher magnification projection of region of brain lobe depicting Fur2+ neurons. Single channel projections of region of brain lobe labeled with (A''', B''') anti-mCherry or (A''', B''') anti-Elav. Scale bar is 20  $\mu$ m. (C) Quantification of total protein in: Elav<sup>C155</sup>>LacZ, Spz5-HA: 109  $\pm$  10; Elav<sup>C155</sup>>Fur2 RNAi<sup>51743</sup>; Spz5-HA: 122  $\pm$  12. (D) Quantification of total protein in: Elav<sup>C155</sup>>LacZ, Spz5-HA: 86  $\pm$  12; Elav<sup>C155</sup>>Fur2, Spz5-HA: 74  $\pm$  12. (E) Quantification of total protein in: Elav<sup>C155</sup>>Spz5-HA; HS-Hid (25°C): 119  $\pm$  17; Elav<sup>C155</sup>>Spz5-HA; HS-Hid (37°C): 110  $\pm$  8.4. (F-G) Representative confocal projections of indicated genotypes labeled with anti-Dcp-1. Scale bar is 50  $\mu$ m. (H) Representative Western blot of Spz5-HA cleavage in indicated genotypes. (I) Quantification of cleaved Spz5-HA to total Spz5-HA normalized to control in: Elav<sup>C155</sup>>Spz5-HA (PBS): 1.0  $\pm$  0.2; Elav<sup>C155</sup>>Spz5-HA (CHX): 2.3  $\pm$  0.5. (J) Quantification of total protein in: Elav<sup>C155</sup>>Spz5-HA (PBS): 33  $\pm$  12; Elav<sup>C155</sup>>Spz5-HA (CHX): 33  $\pm$  11. (K) qRT-PCR analysis of relative *Fur2* mRNA levels in: HS-Hid (25°C): 1.0  $\pm$  0.54; HS-Hid (37°C): 0.98  $\pm$  0.34. (L) Quantification of total protein in: Elav<sup>C155</sup>>LacZ; Spz5-HA: 85  $\pm$  9.5; Elav<sup>C155</sup>> P35; Spz5-HA: 86  $\pm$  6.2. (M) Quantification of Dcp-1 particles in indicated genotypes. Means are: Elav<sup>C155</sup>/+: 376; Elav<sup>C155</sup>>P35: 248. (N-O) Representative confocal projections of indicated genotypes labeled with anti-Dcp-1. Error bars for bar graphs are SEM. Error bars for box and whisker plots are minimum and maximum values. n is noted at the bottom of each column. n.s., not significantly different; \*, P<0.05; \*\*\*, P<0.001.

Figure S6

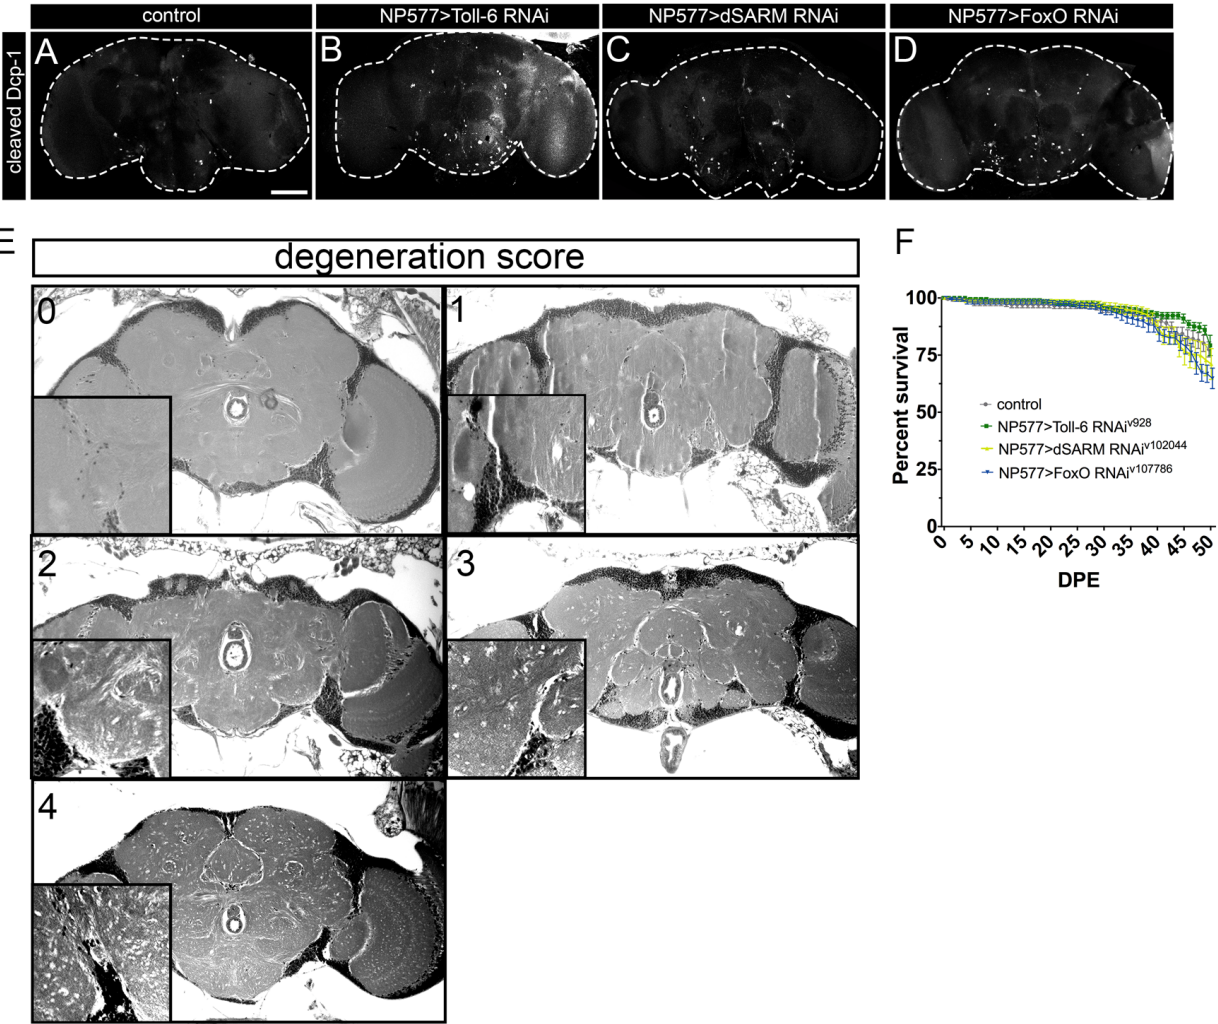

Figure S6. **Apoptotic debris and neurodegeneration phenotypes, related to Figure 7.** (A-D) Representative z-projections of adult brains of indicated genotypes labeled with anti-Dcp-1. Scale bar is 100  $\mu$ m. (E) Neurodegeneration index. (F) Lifespan analysis of adult flies of indicated genotypes.

Table S1

|                                                     | # Dcp-1 particles (brain) |     |    |              | # Dcp-1 particles (VNC) |     |    |              |
|-----------------------------------------------------|---------------------------|-----|----|--------------|-------------------------|-----|----|--------------|
|                                                     | Mean                      | SEM | n  | Significant? | Mean                    | SEM | n  | Significant? |
| wild type (OregonR; OR)                             | 353                       | 19  | 9  | n/a          | 113                     | 5.5 | 9  | n/a          |
| Toll-6 <sup>EX13</sup>                              | 641                       | 52  | 10 | ***          | 170                     | 6.5 | 10 | **           |
| FoxO <sup>Δ94</sup>                                 | 613                       | 32  | 14 | ***          | 182                     | 15  | 14 | ***          |
| Toll-6 <sup>EX13</sup> , FoxO <sup>Δ94</sup>        | 563                       | 31  | 8  | *            | 169                     | 8.6 | 8  | *            |
| dSARM <sup>4621/4705</sup>                          | 594                       | 31  | 14 | ***          | 174                     | 8.4 | 15 | ***          |
| Toll-6 <sup>EX13</sup> /+                           | 422                       | 30  | 12 | ns           | 132                     | 6.6 | 12 | ns           |
| dSARM <sup>4621</sup> /+                            | 418                       | 24  | 16 | ns           | 132                     | 7.1 | 16 | ns           |
| dSARM <sup>4621</sup> /+, Toll-6 <sup>EX13</sup> /+ | 666                       | 23  | 16 | ***          | 209                     | 6.6 | 16 | ***          |
| FoxO <sup>Δ94</sup> /+                              | 381                       | 24  | 11 | ns           | 131                     | 9.2 | 11 | ns           |
| dSARM <sup>4621</sup> /+, FoxO <sup>Δ94</sup> /+    | 713                       | 23  | 11 | ***          | 186                     | 8.9 | 11 | ***          |
| Toll-7 <sup>91-1</sup>                              | 378                       | 37  | 9  | ns           | 110                     | 4.7 | 0  | ns           |
| Toll-7 <sup>AWI</sup>                               | 402                       | 33  | 9  | ns           | 146                     | 5.3 | 10 | ns           |
| Rel <sup>E20</sup>                                  | 395                       | 40  | 11 | ns           | 125                     | 8.5 | 11 | ns           |
| MyD88 <sup>C03881</sup>                             | 375                       | 37  | 12 | ns           | 112                     | 5.1 | 13 | ns           |
| Df(2R)BDSC279/+                                     | 569                       | 34  | 11 | **           | 178                     | 15  | 11 | **           |
| Df(2R)BDSC280/+                                     | 432                       | 32  | 8  | ns           | 130                     | 11  | 8  | ns           |
| MyD88 <sup>C03881</sup> /Df(2R)BDSC280              | 446                       | 34  | 14 | ns           | 151                     | 6.9 | 14 | ns           |
|                                                     |                           |     |    |              |                         |     |    |              |
| Elav <sup>C155</sup> Gal4/+                         | 386                       | 16  | 15 | n/a          | 123                     | 8.5 | 16 | ns           |
| Elav <sup>C155</sup> >Toll-6 RNAi <sup>v928</sup>   | 383                       | 23  | 15 | ns           | 115                     | 6.6 | 16 | ns           |
| Elav <sup>C155</sup> >dSARM RNAi <sup>v102044</sup> | 400                       | 28  | 18 | ns           | 107                     | 4.4 | 14 | ns           |
| Elav <sup>C155</sup> >FoxO RNAi <sup>v107786</sup>  | 382                       | 29  | 11 | ns           | 106                     | 6.3 | 12 | ns           |
|                                                     |                           |     |    |              |                         |     |    |              |
| RepoGal4/+                                          | 388                       | 28  | 11 | n/a          | 109                     | 5   | 13 | n/a          |
| Repo>Toll-6 RNAi <sup>v928</sup>                    | 631                       | 29  | 12 | ***          | 187                     | 5.7 | 14 | ***          |
| Repo>dSARM RNAi <sup>v102044</sup>                  | 593                       | 29  | 9  | **           | 184                     | 10  | 12 | ***          |
| Repo>FoxO RNAi <sup>v107786</sup>                   | 599                       | 41  | 13 | **           | 160                     | 11  | 11 | *            |
| Nrv2>Toll-6 RNAi <sup>v928</sup>                    | 722                       | 31  | 10 | ***          | 192                     | 15  | 12 | ***          |
| Inx2>Toll-6 RNAi <sup>v928</sup>                    | 681                       | 72  | 13 | **           | 194                     | 12  | 14 | ***          |
| NP577>Toll-6 RNAi <sup>v928</sup>                   | 600                       | 27  | 12 | **           | 189                     | 6.6 | 16 | ***          |
| Alrm>Toll-6 RNAi <sup>v928</sup>                    | 403                       | 27  | 10 | ns           | 120                     | 8.3 | 10 | ns           |
| Mz0709>Toll-6 RNAi <sup>v928</sup>                  | 381                       | 23  | 12 | ns           | 115                     | 9.3 | 12 | ns           |
| NP6293>Toll-6 RNAi <sup>v928</sup>                  | 445                       | 36  | 11 | ns           | 111                     | 12  | 11 | ns           |
| Spg>Toll-6 RNAi <sup>v928</sup>                     | 412                       | 18  | 10 | ns           | 134                     | 11  | 10 | ns           |
|                                                     |                           |     |    |              |                         |     |    |              |
| NP577Gal4/+                                         | 350                       | 18  | 17 | n/a          | 121                     | 5.1 | 18 | n/a          |
| NP577>Toll-6 RNAi <sup>v928</sup>                   | 600                       | 27  | 12 | ***          | 189                     | 6.4 | 14 | ***          |
| NP577>Toll-6 RNAi <sup>BDSC</sup>                   | 637                       | 28  | 9  | ***          | 185                     | 8.6 | 10 | ***          |
| NP577>dSARM RNAi <sup>v102044</sup>                 | 614                       | 28  | 10 | ***          | 196                     | 8.6 | 10 | ***          |
| NP577>dSARM RNAi <sup>v105369</sup>                 | 617                       | 24  | 9  | ***          | 201                     | 8.8 | 10 | ***          |
| NP577>FoxO RNAi <sup>v107786</sup>                  | 628                       | 25  | 12 | ***          | 183                     | 8.4 | 13 | ***          |
| NP577>FoxO RNAi <sup>BDSC</sup>                     | 607                       | 42  | 9  | **           | 174                     | 11  | 10 | *            |
| NP577>Toll-6                                        | 228                       | 14  | 20 | *            | 79                      | 3.9 | 19 | ***          |
| NP577>Toll-6 <sup>11R66ad</sup>                     | 379                       | 16  | 12 | ns           | 127                     | 5.1 | 12 | ns           |
| NP577>Toll-6, dSARM <sup>4621</sup>                 | 687                       | 31  | 9  | *            | 240                     | 14  | 8  | *            |
| NP577>Toll-6, FoxO <sup>Δ94</sup>                   | 709                       | 27  | 11 | ***          | 163                     | 12  | 11 | ns           |
| NP577>dSARM                                         | 284                       | 13  | 26 | ns           | 108                     | 6.8 | 11 | ns           |

|                                                    |     |    |    |     |     |     |    |     |
|----------------------------------------------------|-----|----|----|-----|-----|-----|----|-----|
| NP577>FoxO                                         | 225 | 15 | 21 | *   | 70  | 4   | 21 | *** |
| Ctxglia-splitGal4/+                                | 373 | 27 | 17 | n/a | 153 | 4.4 | 17 | n/a |
| Ctxglia-split>Toll-6<br>RNAi <sup>v928</sup>       | 729 | 34 | 16 | *** | 211 | 10  | 15 | *   |
| Ctxglia-split>dSARM<br>RNAi <sup>v102044</sup>     | 730 | 28 | 14 | *** | 259 | 13  | 16 | *** |
| Ctxglia-split>FoxO<br>RNAi <sup>v107786</sup>      | 617 | 26 | 17 | *** | 212 | 11  | 17 | **  |
| Ctxglia-split>Dorsal<br>RNAi <sup>BDSC27650</sup>  | 417 | 29 | 12 | ns  | 136 | 12  | 12 | ns  |
| Ctxglia-split> Dorsal<br>RNAi <sup>BDSC34938</sup> | 418 | 32 | 11 | ns  | 133 | 15  | 11 | ns  |

**Table S1. Toll-6-FoxO signaling functions in cortex glia to regulate apoptotic debris, related to Figure 1.** Quantification of Dcp-1 particles in the brain and VNC of indicated genotypes. n.s., not significantly different. \*, P<0.05; \*\*, P<0.01; \*\*\*, P<0.001.

Table S2

| Even-skipped (Eve) dorsally projecting motor and interneurons |                                      |      |    |              |                           |     |    |              |
|---------------------------------------------------------------|--------------------------------------|------|----|--------------|---------------------------|-----|----|--------------|
| Genotype                                                      | Mean # Eve + cells (abdominal VNC)   | SEM  | n  | Significant? |                           |     |    |              |
| OR                                                            | 33                                   | 0.52 | 24 | n/a          |                           |     |    |              |
| Toll-6 <sup>EX13</sup>                                        | 34                                   | 0.89 | 15 | n.s.         |                           |     |    |              |
| dSARM <sup>4621/4705</sup>                                    | 34                                   | 0.96 | 19 | n.s.         |                           |     |    |              |
| FoxO <sup>Δ94</sup>                                           | 33                                   | 0.71 | 24 | n.s.         |                           |     |    |              |
| NP577Gal4/+                                                   | 34                                   | 0.79 | 13 | n.s.         |                           |     |    |              |
| NP577>Toll-6 RNAi <sup>v928</sup>                             | 35                                   | 0.77 | 15 | n.s.         |                           |     |    |              |
| NP577>dSARM RNAi <sup>v102044</sup>                           | 33                                   | 0.65 | 20 | n.s.         |                           |     |    |              |
| NP577>FoxO RNAi <sup>v107786</sup>                            | 33                                   | 0.84 | 28 | n.s.         |                           |     |    |              |
| Elav <sup>C155</sup> Gal4/+                                   | 34                                   | 0.85 | 30 | n.s.         |                           |     |    |              |
| Elav <sup>C155</sup> >spz5 RNAi <sup>102389</sup>             | 36                                   | 0.85 | 19 | n.s.         |                           |     |    |              |
| Elav <sup>C155</sup> >spz5 RNAi <sup>41295</sup>              | 35                                   | 1.0  | 15 | n.s.         |                           |     |    |              |
| Hb9 ventrally projecting motor and interneurons               |                                      |      |    |              |                           |     |    |              |
| Genotype                                                      | Mean # Hb9 + cells (thoracic VNC)    | SEM  | n  | Significant? | Mean # Hb9+ cells/lobe    | SEM | n  | Significant? |
| OR                                                            | 123                                  | 6.1  | 7  | n/a          | 119                       | 2.9 | 13 | n/a          |
| Toll-6 <sup>EX13</sup>                                        | 120                                  | 4.1  | 23 | n.s.         | 123                       | 3.2 | 21 | n.s.         |
| dSARM <sup>4621/4705</sup>                                    | 118                                  | 3.8  | 17 | n.s.         | 114                       | 3.5 | 11 | n.s.         |
| FoxO <sup>Δ94</sup>                                           | 118                                  | 3.6  | 27 | n.s.         | 117                       | 4.7 | 11 | n.s.         |
| NP577Gal4/+                                                   | 109                                  | 2.5  | 18 | n.s.         | 114                       | 3.3 | 17 | n.s.         |
| NP577>Toll-6 RNAi <sup>v928</sup>                             | 114                                  | 3.3  | 23 | n.s.         | 111                       | 3.0 | 17 | n.s.         |
| NP577>dSARM RNAi <sup>v102044</sup>                           | 119                                  | 3.3  | 23 | n.s.         | 118                       | 2.6 | 19 | n.s.         |
| NP577>FoxO RNAi <sup>v107786</sup>                            | 114                                  | 2.6  | 17 | n.s.         | 118                       | 3.9 | 10 | n.s.         |
| Elav <sup>C155</sup> Gal4/+                                   | 131                                  | 3.8  | 21 | n.s.         | 131                       | 3.3 | 18 | n.s.         |
| Elav <sup>C155</sup> >spz5 RNAi <sup>102389</sup>             | 132                                  | 3.1  | 18 | n.s.         | 139                       | 4.0 | 15 | n.s.         |
| Elav <sup>C155</sup> >spz5 RNAi <sup>41295</sup>              | 126                                  | 4.4  | 14 | n.s.         | 125                       | 4.4 | 10 | n.s.         |
| Dbx interneurons                                              |                                      |      |    |              |                           |     |    |              |
| Genotype                                                      | Mean # Dbx + cells (thoracic VNC)    | SEM  | n  | Significant? | Mean # Dbx+ cells/lobe    | SEM | n  | Significant? |
| OR                                                            | 125                                  | 2.8  | 17 | n/a          | 332                       | 4.4 | 16 | n/a          |
| Toll-6 <sup>EX13</sup>                                        | 124                                  | 3.5  | 9  | n.s.         | 345                       | 5.9 | 8  | n.s.         |
| dSARM <sup>4621/4705</sup>                                    | 124                                  | 4.4  | 7  | n.s.         | 330                       | 7   | 7  | n.s.         |
| FoxO <sup>Δ94</sup>                                           | 128                                  | 3.1  | 9  | n.s.         | 331                       | 7.1 | 11 | n.s.         |
| NP577Gal4/+                                                   | 125                                  | 3    | 15 | n.s.         | 353                       | 9.3 | 13 | n.s.         |
| NP577>Toll-6 RNAi <sup>v928</sup>                             | 125                                  | 3.9  | 13 | n.s.         | 349                       | 12  | 14 | n.s.         |
| NP577>dSARM RNAi <sup>v102044</sup>                           | 125                                  | 2.2  | 12 | n.s.         | 333                       | 5   | 12 | n.s.         |
| NP577>FoxO RNAi <sup>v107786</sup>                            | 125                                  | 3.9  | 9  | n.s.         | 340                       | 9   | 9  | n.s.         |
| NP577+ cortex glia (and small subset of neurons)              |                                      |      |    |              |                           |     |    |              |
| Genotype                                                      | Mean # NP577 + cells (abdominal VNC) | SEM  | n  | Significant? | Mean # NP577 + cells/lobe | SEM | n  | Significant? |
| NP577>GFP.NLS/+                                               | 102                                  | 4.3  | 16 | n/a          | 233                       | 5.8 | 21 | n/a          |
| NP577>GFP.NLS; Toll-6 <sup>EX13</sup>                         | 110                                  | 6.2  | 12 | n.s.         | 243                       | 8.3 | 13 | n.s.         |

|                                                 |     |     |    |      |     |     |    |      |
|-------------------------------------------------|-----|-----|----|------|-----|-----|----|------|
| NP577>GFP.NLS;<br>dSARM <sup>4621/4705</sup>    | 111 | 4.2 | 13 | n.s. | 239 | 5.2 | 14 | n.s. |
| NP577>GFP.NLS;<br>FoxO <sup>Δ94</sup>           | 102 | 2.5 | 8  | n.s. | 232 | 5.6 | 13 | n.s. |
| NP577>GFP.NLS; Toll-6<br>RNAi <sup>v928</sup>   | 113 | 3.6 | 12 | n.s. | 235 | 8.8 | 8  | n.s. |
| NP577>GFP.NLS;<br>dSARM RNAi <sup>v102044</sup> | 105 | 4.4 | 12 | n.s. | 232 | 4.1 | 11 | n.s. |
| NP577>GFP.NLS; FoxO<br>RNAi <sup>v107786</sup>  | 120 | 6.4 | 10 | n.s. | 241 | 7.3 | 12 | n.s. |

**Table S2. Cortex glial Toll-6-FoxO signaling does not regulate neuronal survival, related to Figure 3.**

Quantification of number of Hb9, Eve, Dbx, or NP577-positive cells in the brain or VNC of indicated genotypes. n.s., not significantly different.

Table S3

| Genotype                                                    | Mean Drpr immunofluorescence (A.U.) |      |    |              |                         |     |    |              |
|-------------------------------------------------------------|-------------------------------------|------|----|--------------|-------------------------|-----|----|--------------|
|                                                             | Mean                                | SEM  | n  | Significant? |                         |     |    |              |
| Ctxglia-split><br>mCD8::GFP/+                               | 1.0                                 | 0.03 | 16 | n/a          |                         |     |    |              |
| Ctxglia-split>Drpr<br>RNAi <sup>BDSC</sup> ; mCD8::GFP      | 0.51                                | 0.06 | 8  | ***          |                         |     |    |              |
| Ctxglia-split> Drpr-l<br>RNAi; mCD8::GFP                    | 0.47                                | 0.04 | 18 | ***          |                         |     |    |              |
| Ctxglia-<br>split>mCD8::GFP/+                               | 1.0                                 | 0.02 | 96 | n/a          |                         |     |    |              |
| Ctxglia-split>Toll-6<br>RNAi <sup>v928</sup> ; mCD8::GFP    | 0.61                                | 0.07 | 14 | ***          |                         |     |    |              |
| Ctxglia-split>Toll-6<br>RNAi <sup>BDSC</sup> ; mCD8::GFP    | 0.69                                | 0.05 | 12 | **           |                         |     |    |              |
| Ctxglia-split> dSARM<br>RNAi <sup>v102044</sup> ; mCD8::GFP | 0.84                                | 0.06 | 25 | ***          |                         |     |    |              |
| Ctxglia-split>dSARM<br>RNAi <sup>v105369</sup> ; mCD8::GFP  | 0.65                                | 0.05 | 26 | ***          |                         |     |    |              |
| Ctxglia-split>FoxO<br>RNAi <sup>v107786</sup> ; mCD8::GFP   | 0.71                                | 0.09 | 15 | ***          |                         |     |    |              |
| Ctxglia-split> FoxO<br>RNAi <sup>BDSC</sup> ; mCD8::GFP     | 0.75                                | 0.04 | 18 | **           |                         |     |    |              |
| NP577>mCD8::GFP/+                                           | 1.0                                 | 0.02 | 42 | n/a          |                         |     |    |              |
| NP577> Toll-6 RNAi <sup>v928</sup> ;<br>mCD8::GFP           | 0.73                                | 0.02 | 9  | ***          |                         |     |    |              |
| NP577> dSARM<br>RNAi <sup>v102044</sup> ; mCD8::GFP         | 0.67                                | 0.05 | 12 | ***          |                         |     |    |              |
| NP577> FoxO<br>RNAi <sup>v107786</sup> ; mCD8::GFP          | 0.66                                | 0.07 | 7  | ***          |                         |     |    |              |
| NP577>mCD8::GFP/+                                           | 1.0                                 | 0.03 | 54 | n/a          |                         |     |    |              |
| NP577>mCD8::GFP;<br>Toll-6 <sup>EX13</sup>                  | 0.64                                | 0.07 | 10 | ***          |                         |     |    |              |
| NP577>mCD8::GFP;<br>dSARM <sup>4621/4705</sup>              | 0.69                                | 0.09 | 15 | ***          |                         |     |    |              |
| NP577>mCD8::GFP;<br>FoxO <sup>A94</sup>                     | 0.77                                | 0.05 | 16 | **           |                         |     |    |              |
|                                                             |                                     |      |    |              |                         |     |    |              |
|                                                             | # Dcp-1 particles (brain)           |      |    |              | # Dcp-1 particles (VNC) |     |    |              |
|                                                             | Mean                                | SEM  | n  | Significant? | Mean                    | SEM | n  | Significant? |
| Ctxglia-split/+                                             | 373                                 | 27   | 17 | n/a          | 153                     | 4.4 | 17 | n/a          |
| Ctxglia-split> Drpr<br>RNAi <sup>BDSC</sup>                 | 1106                                | 93   | 10 | ***          | 594                     | 60  | 10 | ***          |
| Ctxglia-split>Drpr<br>RNAi <sup>3B</sup>                    | 944                                 | 74   | 8  | **           | 307                     | 25  | 8  | **           |
| Ctxglia-split>Drpr-l RNAi                                   | 905                                 | 100  | 11 | ***          | 285                     | 29  | 11 | *            |
| NP577Gal4/+                                                 | 350                                 | 18   | 17 | n/a          | 121                     | 5.1 | 18 | n/a          |
| NP577>Drpr-l                                                | 385                                 | 17   | 11 | n.s.         | 111                     | 5.4 | 11 | n.s.         |
| NP577Gal4/+;; Toll-6 <sup>EX13</sup>                        | 682                                 | 32   | 11 | ***          | 179                     | 10  | 9  | **           |
| NP577>Drpr-l; Toll-6 <sup>EX13</sup>                        | 423                                 | 14   | 27 | n.s.         | 122                     | 6.1 | 20 | n.s.         |
| NP577Gal4/+;;<br>dSARM <sup>4621/4705</sup>                 | 589                                 | 33   | 11 | ***          | 215                     | 10  | 11 | ***          |
| NP577>Drpr-l;<br>dSARM <sup>4621/4705</sup>                 | 367                                 | 18   | 10 | n.s.         | 126                     | 8.3 | 11 | n.s.         |
| NP577Gal4/+;; FoxO <sup>A94</sup>                           | 609                                 | 26   | 10 | ***          | 192                     | 10  | 10 | ***          |
| NP577>Drpr-l; FoxO <sup>A94</sup>                           | 413                                 | 22   | 17 | n.s.         | 137                     | 8.9 | 17 | n.s.         |

**Table S3** (accompanies Figure 3). Quantification of mean Drpr intensity and Dcp-1 particles in indicated genotypes. Statistical comparisons depicted here are compared to control. n.s., not significantly different. \*, P<0.05; \*\*, P<0.01; \*\*\*, P<0.001.

Table S4

| Genotype                                                   | # Annexin V particles in the brain/ 5 $\mu$ m depth |     |    |              | Proportion of engulfed Annexin V particles |      |    |              |
|------------------------------------------------------------|-----------------------------------------------------|-----|----|--------------|--------------------------------------------|------|----|--------------|
|                                                            | Mean                                                | SEM | n  | Significant? | Mean                                       | SEM  | n  | Significant? |
| Ctxglia-split>LacZ;<br>mCD8::GFP                           | 113                                                 | 7.3 | 20 | n/a          | 0.75                                       | 0.02 | 20 | n/a          |
| Ctxglia-split>Toll-6<br>RNAi <sup>v928</sup> ; mCD8::GFP   | 190                                                 | 8.3 | 19 | ***          | 0.54                                       | 0.03 | 27 | ***          |
| Ctxglia-split>dSARM<br>RNAi <sup>v102044</sup> ; mCD8::GFP | 188                                                 | 6.6 | 17 | ***          | 0.56                                       | 0.02 | 22 | ***          |
| Ctxglia-split>FoxO<br>RNAi <sup>v107786</sup> ; mCD8::GFP  | 180                                                 | 9.1 | 18 | ***          | 0.54                                       | 0.03 | 22 | ***          |
| Ctxglia-split>Drpr-l<br>RNAi; mCD8::GFP                    | 177                                                 | 10  | 19 | ***          | 0.48                                       | 0.02 | 27 | ***          |

Table S4 (accompanies Figure 4). Quantification of number of Annexin V particles and proportion of engulfed Annexin V particles in indicated genotypes. \*\*\*, P<0.001.



Table S5

| Genotype                                            | Quantification of Dcp-1 particles |     |    |              | Mean Drpr immunofluorescence (A.U.) |      |    |              |
|-----------------------------------------------------|-----------------------------------|-----|----|--------------|-------------------------------------|------|----|--------------|
|                                                     | Mean                              | SEM | n  | Significant? | Mean                                | SEM  | n  | Significant? |
| Elav <sup>C155</sup> Gal4/+                         | 376                               | 19  | 11 | n/a          | 0.99                                | 0.04 | 18 | n/a          |
| Elav <sup>C155</sup> >Spz5 RNAi <sup>v102389</sup>  | 683                               | 44  | 14 | ***          | 0.57                                | 0.04 | 19 | ***          |
| Elav <sup>C155</sup> >Spz5 RNAi <sup>v41295</sup>   | 731                               | 49  | 13 | ***          | 0.71                                | 0.08 | 11 | *            |
| Elav <sup>C155</sup> >Spz5 RNAi <sup>BDS</sup>      | 724                               | 40  | 14 | ***          |                                     |      |    |              |
| wild type (OR)                                      | 435                               | 13  | 8  | n/a          | 1.0                                 | 0.03 | 36 | n/a          |
| Spz5 <sup>AW18</sup>                                | 699                               | 43  | 13 | **           | 0.73                                | 0.05 | 37 | ***          |
| Spz5 <sup>AW18</sup> /+                             | 441                               | 19  | 15 | n.s.         |                                     |      |    |              |
| Spz5 <sup>AW18</sup> /+, Toll-6 <sup>EX13</sup> /+  | 736                               | 33  | 12 | ***          |                                     |      |    |              |
| Spz5 <sup>AW18</sup> /+, dSARM <sup>4621</sup> /+   | 710                               | 37  | 13 | ***          |                                     |      |    |              |
| Spz5 <sup>AW18</sup> /+, FoxO <sup>Δ94</sup> /+     | 669                               | 29  | 11 | **           |                                     |      |    |              |
| Elav <sup>C155</sup> >P35                           | 248                               | 16  | 15 | n/a          |                                     |      |    |              |
| Elav <sup>C155</sup> /+;; Toll-6 <sup>EX13</sup>    | 730                               | 38  | 9  | ***          |                                     |      |    |              |
| Elav <sup>C155</sup> >P35; Toll-6 <sup>EX13</sup>   | 320                               | 18  | 12 | n.s.         |                                     |      |    |              |
| NP577Gal4/+                                         | 524                               | 47  | 5  | n/a          |                                     |      |    |              |
| NP577Gal4/+;; Spz5 <sup>AW18</sup>                  | 786                               | 46  | 11 | *            |                                     |      |    |              |
| NP577>Drpr-I; Spz5 <sup>AW18</sup>                  | 543                               | 27  | 12 | n.s.         |                                     |      |    |              |
| Elav <sup>C155</sup> Gal4/+                         | 376                               | 19  | 11 | n/a          |                                     |      |    |              |
| Elav <sup>C155</sup> >Spz5-HA                       | 399                               | 32  | 9  | n.s.         |                                     |      |    |              |
| Elav <sup>C155</sup> Gal4/+;; Spz5 <sup>AW18</sup>  | 735                               | 41  | 8  | ***          |                                     |      |    |              |
| Elav <sup>C155</sup> >Spz5-HA, Spz5 <sup>AW18</sup> | 471                               | 22  | 15 | n.s.         |                                     |      |    |              |
| Ctxglia-splitGal4/+                                 | 373                               | 27  | 17 | n/a          |                                     |      |    |              |
| Ctxglia-split>Spz5 RNAi <sup>v102389</sup>          | 377                               | 28  | 11 | n.s.         |                                     |      |    |              |
| Ctxglia-split>Spz5 RNAi <sup>v41295</sup>           | 432                               | 33  | 10 | n.s.         |                                     |      |    |              |

Table S5 (accompanies Figure 5). Quantification of Dcp-1 particles and Drpr immunofluorescence in indicated genotypes. Statistical comparisons depicted here are compared to controls. n.s., not significantly different. \*, P<0.05; \*\*, P<0.01; \*\*\*, P<0.001.

Table S6.

| Genotype                                                   | Quantification of Dcp-1 particles           |            |          |                     | Mean Drpr immunofluorescence (A.U.) |      |    |               |
|------------------------------------------------------------|---------------------------------------------|------------|----------|---------------------|-------------------------------------|------|----|---------------|
|                                                            | Mean                                        | SEM        | n        | Significant?        | Mean                                | SEM  | n  | Significant ? |
| Elav <sup>C155</sup> Gal4/+                                | 451                                         | 21         | 14       | n/a                 | 1.0                                 | 0.02 | 60 | n/a           |
| Elav <sup>C155</sup> >Fur1 RNAi <sup>41914</sup>           | 640                                         | 50         | 17       | *                   | 0.87                                | 0.08 | 27 | *             |
| Elav <sup>C155</sup> >Fur1 RNAi <sup>42481</sup>           | 631                                         | 26         | 17       | **                  | 0.84                                | 0.05 | 17 | *             |
| Elav <sup>C155</sup> >Fur2 RNAi <sup>51743</sup>           | 785                                         | 53         | 12       | ***                 | 0.72                                | 0.03 | 18 | ***           |
| Elav <sup>C155</sup> >Fur2 RNAi <sup>42577</sup>           | 694                                         | 36         | 21       | ***                 | 0.72                                | 0.05 | 25 | ***           |
| Elav <sup>C155</sup> >Fur2 RNAi <sup>25959</sup>           | 642                                         | 45         | 15       | *                   | 0.59                                | 0.04 | 16 | ***           |
|                                                            |                                             |            |          |                     |                                     |      |    |               |
| Elav <sup>C155</sup> Gal4/+                                | 451                                         | 21         | 14       | n/a                 | 1.0                                 | 0.04 | 18 | n/a           |
| Elav <sup>C155</sup> >Fur1 <sup>R</sup>                    | 479                                         | 40         | 10       | n.s.                |                                     |      |    |               |
| Elav <sup>C155</sup> >Fur1 <sup>X</sup>                    | 504                                         | 60         | 8        | n.s.                |                                     |      |    |               |
| Elav <sup>C155</sup> >Fur2                                 | 345                                         | 26         | 15       | *                   | 1.3                                 | 0.06 | 16 | ***           |
|                                                            |                                             |            |          |                     |                                     |      |    |               |
|                                                            | <b>Cleaved Spz5-HA/total Spz5-HA (A.U.)</b> |            |          |                     |                                     |      |    |               |
|                                                            | <b>Mean</b>                                 | <b>SEM</b> | <b>n</b> | <b>Significant?</b> |                                     |      |    |               |
| Elav <sup>C155</sup> >LacZ; Spz5-HA                        | 1.0                                         | 0.2        | 9        | n/a                 |                                     |      |    |               |
| Elav <sup>C155</sup> >Fur2 RNAi <sup>51743</sup> ; Spz5-HA | 0.47                                        | 0.07       | 13       | **                  |                                     |      |    |               |
|                                                            |                                             |            |          |                     |                                     |      |    |               |
| Elav <sup>C155</sup> >LacZ; Spz5-HA                        | 1.0                                         | 0.12       | 7        | n/a                 |                                     |      |    |               |
| Elav <sup>C155</sup> >Spz5-HA, Fur2                        | 3.8                                         | 1.2        | 9        | *                   |                                     |      |    |               |
|                                                            |                                             |            |          |                     |                                     |      |    |               |
| Elav <sup>C155</sup> >Spz5-HA; HS-Hid (25°C)               | 1.0                                         | 0.09       | 6        | n/a                 |                                     |      |    |               |
| Elav <sup>C155</sup> >Spz5-HA; HS-Hid (37°C)               | 2.1                                         | 0.41       | 11       | *                   |                                     |      |    |               |
|                                                            |                                             |            |          |                     |                                     |      |    |               |
| Elav <sup>C155</sup> >LacZ; Spz5-HA                        | 1.0                                         | 0.07       | 9        | n/a                 |                                     |      |    |               |
| Elav <sup>C155</sup> >P35; Spz5-HA                         | 0.6                                         | 0.09       | 11       | **                  |                                     |      |    |               |

Table S6 (accompanies Figure 6). Quantification of Dcp-1 particles, mean Drpr immunofluorescence, and Spz-5 cleavage in indicated genotypes. Statistical comparisons depicted here are compared to controls. n.s., not significantly different. \*, P<0.05; \*\*, P<0.01; \*\*\*, P<0.001.

Table S7

| Genotype                                               | Quantification of Dcp-1 particles |     |    |              |                                |     |    |              |                                |     |    |              |
|--------------------------------------------------------|-----------------------------------|-----|----|--------------|--------------------------------|-----|----|--------------|--------------------------------|-----|----|--------------|
|                                                        | Mean                              | SEM | n  | Significant? |                                |     |    |              |                                |     |    |              |
| wild type                                              | 41                                | 5.7 | 8  | n/a          |                                |     |    |              |                                |     |    |              |
| Toll-6 <sup>EX13</sup>                                 | 73                                | 4.3 | 13 | **           |                                |     |    |              |                                |     |    |              |
| FoxO <sup>Δ94</sup>                                    | 80                                | 8.4 | 10 | **           |                                |     |    |              |                                |     |    |              |
| NP577Gal4/+                                            | 41                                | 4.2 | 10 | n/a          |                                |     |    |              |                                |     |    |              |
| NP577>Toll-6<br>RNAi <sup>v928</sup>                   | 75                                | 2.7 | 14 | ***          |                                |     |    |              |                                |     |    |              |
| NP577>Toll-6<br>RNAi <sup>BDSC</sup>                   | 78                                | 6.4 | 14 | **           |                                |     |    |              |                                |     |    |              |
| NP577>dSARM<br>RNAi <sup>v102044</sup>                 | 83                                | 3.1 | 10 | ***          |                                |     |    |              |                                |     |    |              |
| NP577>dSARM<br>RNAi <sup>v105369</sup>                 | 75                                | 3.2 | 9  | **           |                                |     |    |              |                                |     |    |              |
| NP577>FoxO<br>RNAi <sup>v107786</sup>                  | 75                                | 3.5 | 11 | **           |                                |     |    |              |                                |     |    |              |
| NP577>FoxO<br>RNAi <sup>BDSC</sup>                     | 74                                | 4.6 | 10 | **           |                                |     |    |              |                                |     |    |              |
| Elav <sup>C155</sup> Gal4/+                            | 44                                | 3.8 | 9  | n/a          |                                |     |    |              |                                |     |    |              |
| Elav <sup>C155</sup> >Toll-6<br>RNAi <sup>v928</sup>   | 48                                | 5.0 | 11 | n.s.         |                                |     |    |              |                                |     |    |              |
| Elav <sup>C155</sup> >dSARM<br>RNAi <sup>v102044</sup> | 42                                | 1.8 | 9  | n.s.         |                                |     |    |              |                                |     |    |              |
| Elav <sup>C155</sup> >FoxO<br>RNAi <sup>v107786</sup>  | 42                                | 4.6 | 10 | n.s.         |                                |     |    |              |                                |     |    |              |
|                                                        |                                   |     |    |              |                                |     |    |              |                                |     |    |              |
|                                                        | 5 DPE neurodegeneration index     |     |    |              | 10 DPE neurodegeneration index |     |    |              | 35 DPE neurodegeneration index |     |    |              |
|                                                        | Mean                              | SEM | n  | Significant? | Mean                           | SEM | n  | Significant? | Mean                           | SEM | n  | Significant? |
| NP577Gal4/+                                            | 1.4                               | 0.2 | 27 | n/a          | 1.2                            | 0.4 | 10 | n/a          | 2.7                            | 0.3 | 11 | n/a          |
| NP577>Toll-6<br>RNAi <sup>v928</sup>                   | 2.1                               | 0.4 | 14 | n.s.         | 3.5                            | 0.2 | 11 | ***          | 3.4                            | 0.3 | 8  | n.s.         |
| NP577>dSARM<br>RNAi <sup>v102044</sup>                 | 2.0                               | 0.3 | 12 | n.s.         | 2.9                            | 0.4 | 11 | **           | 2.8                            | 0.2 | 16 | n.s.         |
| NP577>FoxO<br>RNAi <sup>v107786</sup>                  | 2.1                               | 0.4 | 11 | n.s.         | 2.6                            | 0.3 | 22 | **           | 2.3                            | 0.4 | 12 | n.s.         |

Table S7 (accompanies Figure 7). Quantification of Dcp-1 particles and neurodegeneration phenotypes in adult brains of indicated genotypes. n.s., not significantly different. \*\*, P<0.01; \*\*\*, P<0.001.
